# Supplementary material for: Probiotic Bifidobacterium breve Induces IL-10-Producing Tr1 Cells in the Colon
Source: PubMed Central journal article supplement (PMC3364948; doi:10.1371/journal.ppat.1002714), 2012-05-31

Figure S3

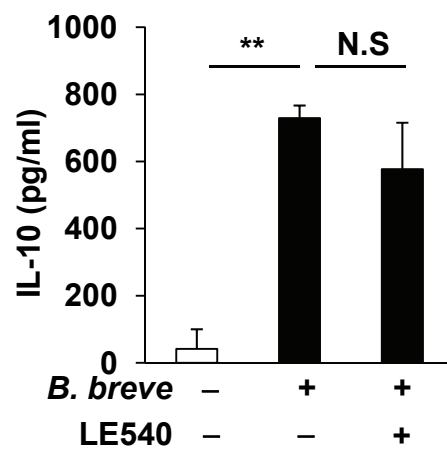

Supplement: ppat.1002714.s003.pdf [file ppat.1002714.s003.pdf]
