# Supplementary material for: Probiotic Bifidobacterium breve Induces IL-10-Producing Tr1 Cells in the Colon
Source: PLoS Pathog. 2012 May 31;8(5):e1002714. doi: 10.1371/journal.ppat.1002714 (PMC3364948; doi:10.1371/journal.ppat.1002714)
Supplement: Table S1 — Composition of fecal commensal microflora in probiotics-fed mice. 6-week-old C57BL/6 mice were fed with L. casei, B. breve or placebo daily (1×109) by oral gavage for 3 months (n = 5, respectively). Fecal samples were collected, weighed and suspended in 9 volumes of sterilized anaerobic transfer medium. Total RNA and DNA fractions extracted from each sample were assessed by RT-qPCR or qPCR with the specific primers. “Number” indicates CFU of each bacteria calculated using control cultured bacteria. (x/5) indicated the right side of “number” show detection rate of mice analyzed. (PDF) [file ppat.1002714.s008.pdf]

Table S1

| bacterial species                      | non-treated |       | <i>L. casei</i> |       | placebo ( <i>L. casei</i> ) |       | <i>B. breve</i> |       | placebo ( <i>B. breve</i> ) |       |
|----------------------------------------|-------------|-------|-----------------|-------|-----------------------------|-------|-----------------|-------|-----------------------------|-------|
|                                        | number      |       | number          |       | number                      |       | number          |       | number                      |       |
| <b>Total bacteria</b>                  | 10.1 ± 0.2  | (5/5) | 10.2 ± 0.3      | (5/5) | 10.1 ± 0.3                  | (5/5) | 10.1 ± 0.2      | (5/5) | 10.2 ± 0.3                  | (5/5) |
| <b>Obligate anaerobic bacteria</b>     |             |       |                 |       |                             |       |                 |       |                             |       |
| <i>Clostridium coccoides</i> group     | 9.7 ± 0.3   | (5/5) | 9.8 ± 0.5       | (5/5) | 9.7 ± 0.6                   | (5/5) | 9.8 ± 0.4       | (5/5) | 9.6 ± 0.4                   | (5/5) |
| <i>C. leptum</i> subgroup              | 8.6 ± 0.5   | (5/5) | 8.7 ± 0.1       | (5/5) | 8.7 ± 0.2                   | (5/5) | 8.5 ± 0.5       | (5/5) | 8.7 ± 0.3                   | (5/5) |
| <i>Bacteroides fragilis</i> group      | 8.7 ± 0.4   | (5/5) | 8.8 ± 0.2       | (5/5) | 8.7 ± 0.1                   | (5/5) | 8.6 ± 0.2       | (5/5) | 8.8 ± 0.2                   | (5/5) |
| Total <i>Bifidobacterium</i>           | 7.5 ± 0.5   | (5/5) | 7.5 ± 0.7       | (5/5) | 7.6 ± 0.4                   | (5/5) | 7.6 ± 0.3       | (5/5) | 7.6 ± 0.4                   | (5/5) |
| <i>Atopobium</i> cluster               | 7.6 ± 0.5   | (5/5) | 7.6 ± 0.6       | (5/5) | 7.9 ± 0.5                   | (5/5) | 7.7 ± 0.5       | (5/5) | 7.6 ± 0.5                   | (5/5) |
| <i>Prevotella</i>                      | 8.5 ± 0.3   | (5/5) | 8.5 ± 0.6       | (5/5) | 8.6 ± 0.4                   | (5/5) | 8.5 ± 0.7       | (5/5) | 8.6 ± 0.5                   | (5/5) |
| <i>Eubacterium cylindroides</i> group  | 7.7 ± 0.6   | (5/5) | 7.5 ± 0.3       | (5/5) | 7.7 ± 0.3                   | (5/5) | 7.6 ± 0.3       | (5/5) | 7.6 ± 0.4                   | (5/5) |
| <i>C. ramosum</i> subgroup             | 6.8 ± 0.3   | (5/5) | 6.8 ± 0.1       | (5/5) | 6.8 ± 0.5                   | (5/5) | 6.9 ± 0.4       | (5/5) | 6.7 ± 0.3                   | (5/5) |
| <i>C. difficile</i>                    | <2.1        | (0/5) | <2.1            | (0/5) | <2.1                        | (0/5) | 5.0             | (1/5) | <2.1                        | (0/5) |
| <i>C. perfringens</i>                  | <3.0        | (0/5) | <3.0            | (0/5) | <3.0                        | (0/5) | <3.0            | (0/5) | <3.0                        | (0/5) |
| <b>Facultative anaerobic bacteria</b>  |             |       |                 |       |                             |       |                 |       |                             |       |
| Total <i>Lactobacillus</i>             | 9.7 ± 0.2   | (5/5) | 9.7 ± 0.1       | (5/5) | 9.6 ± 0.1                   | (5/5) | 9.3 ± 0.1       | (5/5) | 9.8 ± 0.5                   | (5/5) |
| <i>L. gasseri</i> subgroup             | 8.7 ± 0.2   | (5/5) | 8.7 ± 1.2       | (5/5) | 8.7 ± 0.2                   | (5/5) | 8.6 ± 0.1       | (5/5) | 8.9 ± 0.2                   | (5/5) |
| <i>L. brevis</i>                       | 3.8 ± 0.1   | (4/5) | 3.9 ± 0.3       | (4/5) | 3.8 ± 0.1                   | (5/5) | 3.8 ± 0.1       | (4/5) | 4.0 ± 0.3                   | (5/5) |
| <i>L. casei</i> subgroup               | <3.0        | (0/5) | 6.0 ± 0.5       | (5/5) | <3.0                        | (0/5) | <3.0            | (0/5) | <3.0                        | (0/5) |
| <i>L. fermentum</i>                    | <3.9        | (0/5) | <3.9            | (0/5) | <3.9                        | (0/5) | <3.9            | (0/5) | <3.9                        | (0/5) |
| <i>L. fructivorans</i>                 | <2.0        | (0/5) | <2.0            | (0/5) | <2.0                        | (0/5) | <2.0            | (0/5) | <2.0                        | (0/5) |
| <i>L. plantarum</i> subgroup           | 3.1 ± 0.1   | (4/5) | 3.2 ± 0.8       | (4/5) | 3.0 ± 0.1                   | (4/5) | 3.1 ± 0.6       | (4/5) | 3.0 ± 0.2                   | (5/5) |
| <i>L. reuteri</i> subgroup             | 8.5 ± 0.3   | (5/5) | 6.6 ± 0.7       | (5/5) | 6.6 ± 0.5                   | (5/5) | 8.6 ± 0.3       | (5/5) | 8.5 ± 0.4                   | (5/5) |
| <i>L. ruminis</i> subgroup             | 9.6 ± 0.2   | (5/5) | 9.5 ± 0.1       | (5/5) | 9.5 ± 0.2                   | (5/5) | 9.5 ± 0.1       | (5/5) | 9.6 ± 0.6                   | (5/5) |
| <i>L. sakei</i> subgroup               | 5.4 ± 0.3   | (5/5) | 5.1 ± 0.2       | (5/5) | 5.3 ± 0.3                   | (5/5) | 5.5 ± 0.4       | (5/5) | 5.3 ± 0.6                   | (5/5) |
| <i>Enterobacteriaceae</i>              | 6.5 ± 0.4   | (5/5) | 6.3 ± 0.6       | (5/5) | 6.4 ± 0.3                   | (5/5) | 6.2 ± 0.2       | (5/5) | 6.3 ± 0.8                   | (5/5) |
| <i>Enterococcus</i>                    | 8.6 ± 0.2   | (5/5) | 8.4 ± 0.1       | (5/5) | 8.4 ± 0.2                   | (5/5) | 8.4 ± 0.2       | (5/5) | 8.5 ± 0.5                   | (5/5) |
| <i>Staphylococcus</i>                  | 5.1 ± 0.6   | (5/5) | 5.1 ± 0.5       | (5/5) | 4.9 ± 0.4                   | (5/5) | 5.0 ± 0.1       | (5/5) | 4.9 ± 0.5                   | (5/5) |
| <b>Aerobic bacteria</b>                |             |       |                 |       |                             |       |                 |       |                             |       |
| <i>Pseudomonas</i>                     | <3.7        | (0/5) | <3.7            | (0/5) | <3.7                        | (0/5) | <3.7            | (0/5) | <3.7                        | (0/5) |
| <b>Administered probiotic bacteria</b> |             |       |                 |       |                             |       |                 |       |                             |       |
| <i>L. casei</i> strain Shirota         | <6.0        | (0/5) | 6.3 ± 0.4       | (3/5) | <6.0                        | (0/5) | <3.7            | (0/5) | <6.0                        | (0/5) |
| <i>B. breve</i> Yakult strain          | <6.0        | (0/5) | <6.0            | (0/5) | <6.0                        | (0/5) | 6.3 ± 0.3       | (5/5) | <6.0                        | (0/5) |

Table S1. Composition of fecal commensal microflora in probiotics-fed mice.

6-week-old C57BL/6 mice were fed with *L. casei*, *B. breve* or placebo daily ( $1 \times 10^9$ ) by oral gavage for 3 months (n=5, respectively). Fecal samples were collected, weighed and suspended in 9 volumes of sterilized anaerobic transfer medium. Total RNA and DNA fractions extracted from each sample were assessed by RT-qPCR or qPCR with the specific primers. “Number” indicates CFU of each bacteria calculated using control cultured bacteria. (x/5) indicated the right side of “number” show detection rate of mice analyzed.
