# Supplementary material for: Probiotic Bifidobacterium breve Induces IL-10-Producing Tr1 Cells in the Colon
Source: PLoS Pathog. 2012 May 31;8(5):e1002714. doi: 10.1371/journal.ppat.1002714 (PMC3364948; doi:10.1371/journal.ppat.1002714)
Supplement: Text S1 — Supplemental methods. Methods for “Analysis of Fecal Microbiota” and “Culture and Killing of B. breve” are described with references. (PDF) [file ppat.1002714.s009.pdf]

## Supplementary Methods

### *Analysis of Fecal Microbiota*

C57BL/6J mice were fed with *L. casei*, *B. breve* ( $10^9$  bacteria each) or placebo daily by oral gavage for 3 months. Then, a few fecal pellets were collected, weighed and suspended in 9 volumes of RNeasy Lysis Buffer (Qiagen), an RNA stabilization solution, to make a fecal homogenate (100 mg feces/ml). In preparation for RNA and DNA extraction, 200  $\mu$ l of the fecal homogenate was centrifuged and washed with PBS. The pellet was stored at -80°C (for extraction of RNA) or -30°C (for extraction of DNA). Total RNA and DNA for analysis fecal microflora (Matsuda et al., 2009), DNA for analysis of *L. casei* and *B. breve* (Fujimoto et al., 2008; Fujimoto et al., 2011) were isolated from fecal samples using the method described elsewhere. Briefly, total RNA was isolated using a modified acidic guanidinium thiocyanate-phenol-chloroform extraction method, and DNA was isolated using a modified phenol- chloroform extraction method. The DNA for analysis of *L. casei* and *B. breve* was extracted using a Stool Mini Kit (QIAGEN). Finally, the nucleic acid fraction extracted from 20 mg feces was suspended in 1 ml nuclease-free water (Ambion).

RT-qPCR and qPCR analyses were performed in 384-well optical plates on an ABI PRISM<sup>®</sup> 7900HT Sequence Detection System (Applied Biosystems). RT-qPCR was conducted in a one-step reaction using a QIAGEN OneStep RT-PCR Kit (QIAGEN) for detection and enumeration of the following bacterial targets: *C. difficile*, *C. perfringens*, Total *Lactobacillus* spp. (*L. gasseri* subgroup, *L. brevis*, *L. casei* subgroup, *L. fermentum*, *L. fructivorans*, *L. plantarum* subgroup, *L. reuteri* subgroup, *L. ruminis* subgroup, *L. sakei* subgroup), Enterobacteriaceae, *Enterococcus* spp., *Streptococcus* spp., *Staphylococcus* spp., and *Pseudomonas* spp. as described elsewhere (Matsuda et al., 2007; Matsuda et al., 2009; Sakaguchi et al.). qPCR was carried out using rTaq (TaKaRa Bio) for detection and enumeration of the following bacterial targets: *Clostridium coccoides* group, *C. leptum* subgroup, *Bacteroides fragilis* group, Total

*Bifidobacterium* spp. (*B. adolescentis*, *B. angulatum*, *B. bifidum*, *B. breve*, *B. catenulatum* group, *B. longum*, *B. infantis*, *B. dentium*), *Atopobium* cluster, *Prevotella* spp., *Eubacterium cylindroides* group, *C. ramosum* subgroup, *L. casei* strain Shirota and *B. breve* strain Yakult as described previously (Fujimoto et al., 2008; Fujimoto et al., 2011; Matsuki et al., 2002; Matsuki et al., 2004; Matsuki et al., 1999; Matsuki et al., 1998).

### **Culture and killing of *B. breve***

*B. breve* was inoculated in GAM broth (Nissui Pharmaceutical) supplemented with 1%(w/v) glucose, and cultured for 24 h at 37 °C under anaerobic conditions. The supernatant of the culture medium was obtained by centrifugation at 15,000 rpm for 10 min, and concentrated to 10-fold by Centricon YM-3 (Milipore, USA). For killing of *B. breve*, UV radiation and sonication was used. For UV radiation, 5 ml of *B. breve* suspension was placed to petri dish, and then UV radiation was performed for 30 min by using 200 nm UV lamp. For sonication, total 5 min of sonication was performed with interval at every 1 min. Viability of *B. breve* was checked by MRS agar plate.

### **Supplementary References**

- Fujimoto, J., Matsuki, T., Sasamoto, M., Tomii, Y., and Watanabe, K. (2008). Identification and quantification of *Lactobacillus casei* strain Shirota in human feces with strain-specific primers derived from randomly amplified polymorphic DNA. *Int J Food Microbiol* 126, 210-215.
- Fujimoto, J., Tanigawa, K., Kudo, Y., Makino, H., and Watanabe, K. (2011). Identification and quantification of viable *Bifidobacterium breve* strain Yakult in human faeces by using strain-specific primers and propidium monoazide. *J Appl Microbiol* 110, 209-217.
- Matsuda, K., Tsuji, H., Asahara, T., Kado, Y., and Nomoto, K. (2007). Sensitive quantitative detection of commensal bacteria by rRNA-targeted reverse transcription-PCR. *Appl Environ Microbiol* 73, 32-39.
- Matsuda, K., Tsuji, H., Asahara, T., Matsumoto, K., Takada, T., and Nomoto, K. (2009).

- Establishment of an analytical system for the human fecal microbiota, based on reverse transcription-quantitative PCR targeting of multicopy rRNA molecules. *Appl Environ Microbiol* 75, 1961-1969.
- Matsuki, T., Watanabe, K., Fujimoto, J., Miyamoto, Y., Takada, T., Matsumoto, K., Oyaizu, H., and Tanaka, R. (2002). Development of 16S rRNA-gene-targeted group-specific primers for the detection and identification of predominant bacteria in human feces. *Appl Environ Microbiol* 68, 5445-5451.
- Matsuki, T., Watanabe, K., Fujimoto, J., Takada, T., and Tanaka, R. (2004). Use of 16S rRNA gene-targeted group-specific primers for real-time PCR analysis of predominant bacteria in human feces. *Appl Environ Microbiol* 70, 7220-7228.
- Matsuki, T., Watanabe, K., Tanaka, R., Fukuda, M., and Oyaizu, H. (1999). Distribution of bifidobacterial species in human intestinal microflora examined with 16S rRNA-gene-targeted species-specific primers. *Appl Environ Microbiol* 65, 4506-4512.
- Matsuki, T., Watanabe, K., Tanaka, R., and Oyaizu, H. (1998). Rapid identification of human intestinal bifidobacteria by 16S rRNA-targeted species- and group-specific primers. *FEMS Microbiol Lett* 167, 113-121.
- Sakaguchi, S., Saito, M., Tsuji, H., Asahara, T., Takata, O., Fujimura, J., Nagata, S., Nomoto, K., and Shimizu, T. Bacterial rRNA-targeted reverse transcription-PCR used to identify pathogens responsible for fever with neutropenia. *J Clin Microbiol* 48, 1624-1628.
